# Supplementary material for: Health-Promoting and Sustainable Behavior in University Students in Germany: A Cross-Sectional Study
Source: MDPI journal article supplement (doi:10.3390/ijerph20075238), 2023-03-23
Supplement: s1 [file s1]

## **Supplementary information**

**Article title:** Health-promoting and sustainable behavior in university students in Germany: a cross-sectional study

**Authors:** Andrea Weber, Katharina Kroiss, Lydia Reismann, Petra Jansen, Gunther Hirschfelder, Anja M. Sedlmeier, Michael J. Stein, Patricia Bohmann, Michael F. Leitzmann, Carmen Jochem

**Journal:** International Journal of Environmental Research and Public Health

**Questionary S1:** Excerpt from the URStudisHealthSurvey questionnaire (translated from German into English)

The questionnaire was developed and administered to students at the University of Regensburg as part of a doctoral thesis (K.K.) on student health.

1: Sociodemographic data

|                                                                |     |
|----------------------------------------------------------------|-----|
| I am a student at the University of Regensburg<br>(obligatory) |     |
| <input type="checkbox"/>                                       | Yes |
| <input type="checkbox"/>                                       | No  |

|                                              |                                                |
|----------------------------------------------|------------------------------------------------|
| What is your field of study?<br>(obligatory) |                                                |
| <input type="checkbox"/>                     | Catholic theology                              |
| <input type="checkbox"/>                     | Law                                            |
| <input type="checkbox"/>                     | Economic sciences                              |
| <input type="checkbox"/>                     | Medicine                                       |
| <input type="checkbox"/>                     | Philosophy, Arts, History, and Social sciences |
| <input type="checkbox"/>                     | Computer and Data science                      |
| <input type="checkbox"/>                     | Human sciences                                 |
| <input type="checkbox"/>                     | Linguistics, Literature, and Cultural studies  |
| <input type="checkbox"/>                     | Mathematics                                    |
| <input type="checkbox"/>                     | Physics                                        |
| <input type="checkbox"/>                     | Biology and Preclinical medicine               |
| <input type="checkbox"/>                     | Chemistry and Pharmacy                         |

|                                                                                  |                 |
|----------------------------------------------------------------------------------|-----------------|
| How long have you been studying at the University of Regensburg?<br>(obligatory) |                 |
| <input type="checkbox"/>                                                         | 1-2 semester(s) |
| <input type="checkbox"/>                                                         | 3-4 semesters   |
| <input type="checkbox"/>                                                         | 5-6 semesters   |
| <input type="checkbox"/>                                                         | 7-8 semesters   |
| <input type="checkbox"/>                                                         | 9-10 semesters  |

|  |                 |
|--|-----------------|
|  | 11-12 semesters |
|  | >12 semesters   |

What gender do you identify with?

*(obligatory)*

|  |                |
|--|----------------|
|  | Male           |
|  | Female         |
|  | Diverse        |
|  | No information |

Please enter your age: ... years

*(optional, free-text field)*

*Providing your age is voluntary, but would be very helpful for scientific analyses.*

How tall are you? ... cm

*(optional, free-text field)*

*Answering this question is voluntary, but it would be very helpful for the scientific analyses. The information about your height is not stored, it is only used to calculate the body mass index (BMI). You will see this displayed in the following.*

What is your weight? ... kg

*(optional, free-text field)*

*Answering this question is voluntary, but it would be very helpful for the scientific analyses. The information about your weight is not stored, it is only used to calculate the BMI. You will see this displayed in the following.*

Your BMI is: ... kg/m<sup>2</sup>

*(displayed by LimeSurvey)*

## 2: Dietary habits

How important is healthy eating behavior to you?

*(obligatory)*

|  |                    |
|--|--------------------|
|  | Very important     |
|  | Somewhat important |

|  |                                   |
|--|-----------------------------------|
|  | Neither important nor unimportant |
|  | Somewhat unimportant              |
|  | Not at all important              |

Please check the statements that apply to you in an ordinary week:

*(obligatory, Multiple choice)*

|  |                                                                                                                                           |
|--|-------------------------------------------------------------------------------------------------------------------------------------------|
|  | I eat a diversified diet and take advantage of food variety                                                                               |
|  | I eat at least three servings of vegetables and two servings of fruit daily                                                               |
|  | I prefer whole grain products                                                                                                             |
|  | I eat milk and dairy products like yogurt and cheese daily                                                                                |
|  | I eat fish once or twice a week                                                                                                           |
|  | I eat no more than 300 to 600g of meat per week                                                                                           |
|  | I prefer vegetable oils (e.g., rapeseed oil) and spreads produced from them                                                               |
|  | I avoid hidden fats (these are often found in processed foods such as sausage, pastries, confectionery, fast food, and convenience foods) |
|  | I use sugar in a sparse way and avoid sugar-sweetened foods and beverages                                                                 |
|  | I try to eat less or no salt                                                                                                              |
|  | I drink around 1.5 liters of water or other calorie-free drinks every day                                                                 |
|  | I make sure that my food is prepared gently                                                                                               |
|  | I eat mindfully and take my time when eating                                                                                              |
|  | I preferably shop regional, seasonal, or organic products                                                                                 |
|  | I regularly cook at home                                                                                                                  |
|  | None of the above                                                                                                                         |
|  | No information                                                                                                                            |

How would you rate the food offerings at the University of Regensburg\*?

*\*Consider for example canteens, cafeterias, and kiosks at the University/University hospital of Regensburg*

*(obligatory)*

|                                             | Yes | Rather<br>yes | Rather<br>no | No | No opinion |
|---------------------------------------------|-----|---------------|--------------|----|------------|
| I am satisfied with the quality of the food |     |               |              |    |            |
| There are enough healthy options            |     |               |              |    |            |
| There are enough vegetarian/vegan options   |     |               |              |    |            |

|                                           |  |  |  |  |  |
|-------------------------------------------|--|--|--|--|--|
| The value for money is realistic/accurate |  |  |  |  |  |
| The offer is diverse enough               |  |  |  |  |  |
| I prefer to bring my own food from home   |  |  |  |  |  |

### 3: Alcohol consumption, psychoactive substances and smoking

|                                       |     |
|---------------------------------------|-----|
| Do you drink alcohol?<br>(obligatory) |     |
| <input type="checkbox"/>              | Yes |
| <input type="checkbox"/>              | No  |

|               |     |    |                |
|---------------|-----|----|----------------|
| (obligatory)  |     |    |                |
|               | Yes | No | No information |
| Do you smoke? |     |    |                |

### 4: Physical activity and health promotion at the University of Regensburg

|                                                                                                                                                                                                                                                                                                                                |
|--------------------------------------------------------------------------------------------------------------------------------------------------------------------------------------------------------------------------------------------------------------------------------------------------------------------------------|
| How many minutes do you do endurance-oriented exercise with moderate intensity in a usual week*?<br>(optional, slide control for the unit minutes/week)                                                                                                                                                                        |
| <p><i>*Examples are: fast walking, slow running (movement that is perceived as somewhat strenuous, where you can still talk but no longer sing)</i></p> <p><i>Note: 5040 minutes = 84 hours, 2520 minutes = 42 hours, 2100 minutes = 35 hours, 1500 minutes = 25 hours, 600 minutes = 10 hours, 300 minutes = 5 hours.</i></p> |

|                                                                                                                                                                                                                                                                                                                                   |
|-----------------------------------------------------------------------------------------------------------------------------------------------------------------------------------------------------------------------------------------------------------------------------------------------------------------------------------|
| How many minutes do you do endurance-oriented exercise with high intensity in a usual week*?<br>(optional, slide control for the unit minutes/week)                                                                                                                                                                               |
| <p><i>*Examples are: running or fast cycling (movement that is perceived as strenuous, during which it is no longer possible to talk consistently)</i></p> <p><i>Note: 5040 minutes = 84 hours, 2520 minutes = 42 hours, 2100 minutes = 35 hours, 1500 minutes = 25 hours, 600 minutes = 10 hours, 300 minutes = 5 hours.</i></p> |

On how many days do you engage in muscle-strengthening physical activities in a usual week\*?

*(optional, slide control for the unit days/week)*

*\*Examples are: Workouts with your own body weight, strength training using equipment.*

How many hours do you spend sitting on an ordinary day?

*(optional, slide control for the unit hours/day)*

How many hours of the above\* do you spend sitting at the university each day?

*(optional, slide control for the unit %)*

*\*Please note: The information is given in percentage.*

I avoid long, uninterrupted periods of sitting and take short breaks every 30 minutes for movement/exercise.

*(obligatory)*

|  |            |
|--|------------|
|  | Yes        |
|  | Rather yes |
|  | Rather no  |
|  | No         |

In the summer term, I usually get to the university by

*(obligatory)*

|  |                        |
|--|------------------------|
|  | Public transport       |
|  | Foot                   |
|  | My own car/vehicle     |
|  | The bike/electric bike |
|  | No information         |

You stated that you regularly cycle to university during summer term. How long does it take you to get **to university and back** during summer term?

*(optional, slide control for the unit minutes/day)*

In the winter term, I usually get to the university by

*(obligatory)*

|  |                  |
|--|------------------|
|  | Public transport |
|  | Foot             |

|  |                        |
|--|------------------------|
|  | My own car/vehicle     |
|  | The bike/electric bike |
|  | No information         |

You stated that you regularly cycle to university during winter term. How long does it take you to get **to university and back** during winter term?  
*(optional, slide control for the unit minutes/day)*

Which of the following health promotion topics at the University of Regensburg would you be interested in?  
*(obligatory, Multiple choice)*

|  |                                                   |
|--|---------------------------------------------------|
|  | Relaxation/ Stress management                     |
|  | Mindfulness                                       |
|  | Dietary habits                                    |
|  | Smoking cessation                                 |
|  | Physical education and exercise programs          |
|  | General health counselling                        |
|  | Health diagnostics for safe and targeted training |
|  | Cooking courses                                   |
|  | Other                                             |
|  | None of the above                                 |

You selected „other“ in the previous question. Please use the following text field\* for specific comments and requests:  
*(optional, free-text field)*

*\*Please make sure that you do not enter any information in the free-text field that could lead to a conclusion about your person.*

## 7: Global health und sustainable behavior

Which health consequences of climate change have you already heard about?  
*(obligatory, Multiple choice)*

|  |                        |
|--|------------------------|
|  | Heatstroke/Heat stress |
|  | Cardiovascular issues  |
|  | Increased allergies    |

|  |                                                                                |
|--|--------------------------------------------------------------------------------|
|  | Mental health issues (e.g., due to natural disasters)                          |
|  | Respiratory symptoms (e.g., due to air pollution)                              |
|  | Increasing global malnutrition                                                 |
|  | Spreading of infectious diseases                                               |
|  | I am well informed about these and other health consequences of climate change |
|  | I am not aware that climate change can have negative impacts on health         |

|                                                                                                                                          |             |
|------------------------------------------------------------------------------------------------------------------------------------------|-------------|
| Do you actively try to reduce your carbon footprint (that means your climate affecting emissions) in your everyday life?<br>(obligatory) |             |
|                                                                                                                                          | Yes, a lot  |
|                                                                                                                                          | Yes, mostly |
|                                                                                                                                          | Neither nor |
|                                                                                                                                          | Unlikely    |
|                                                                                                                                          | Not at all  |

|                                                                                                 |             |        |             |          |               |
|-------------------------------------------------------------------------------------------------|-------------|--------|-------------|----------|---------------|
| How likely would you consider yourself to engage in the following?<br>(obligatory)              |             |        |             |          |               |
|                                                                                                 | Very likely | Likely | Neither nor | Unlikely | Very unlikely |
| Ride a bicycle /electric-bike instead of a fuel-consuming car in your everyday life             |             |        |             |          |               |
| Use public transportation (e.g., bus, train) for travelling instead of cars or planes           |             |        |             |          |               |
| Regularly consume a diet predominantly free of meat and fish products (i.e., a vegetarian diet) |             |        |             |          |               |
| Regularly consume a diet entirely free of animal products (i.e., a vegan diet)                  |             |        |             |          |               |

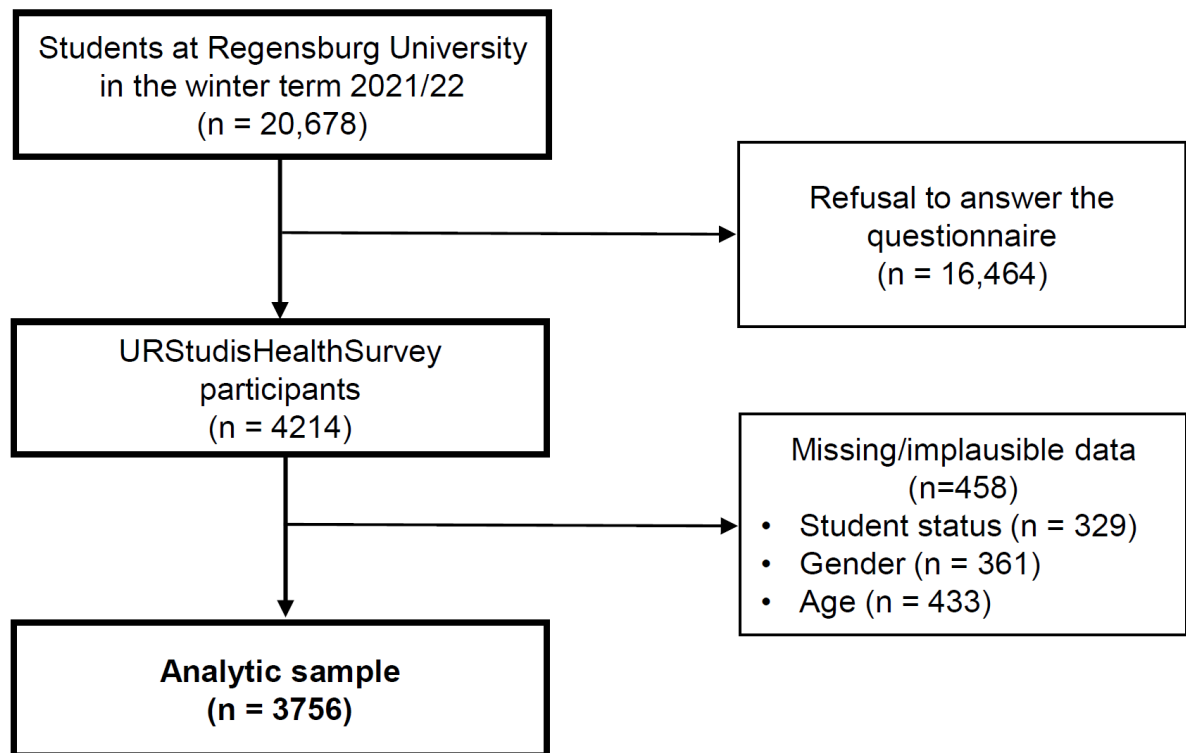

**Figure S1:** Flow chart

**Table S1:** Informedness by age and gender: What health consequences of climate change have you already heard about?

| Gender | Age group | Heatstroke/<br>Heat stress | Cardiovascular<br>issues | Increased<br>allergies | Mental<br>health<br>issues | Respiratory<br>symptoms | Global<br>malnutrition | Infectious<br>diseases | Well<br>informed<br>about all<br>these | Not aware<br>about<br>health<br>impacts<br>of climate<br>change |
|--------|-----------|----------------------------|--------------------------|------------------------|----------------------------|-------------------------|------------------------|------------------------|----------------------------------------|-----------------------------------------------------------------|
| Men    | < 22      | 62                         | 51                       | 52                     | 57                         | 67                      | 80                     | 70                     | 31                                     | 11                                                              |
|        | 22-25     | 59                         | 56                       | 55                     | 57                         | 65                      | 74                     | 68                     | 34                                     | 11                                                              |
|        | > 25      | 72                         | 66                       | 63                     | 63                         | 72                      | 78                     | 73                     | 44                                     | 9                                                               |
| Women  | < 22      | 50                         | 46                       | 59                     | 64                         | 67                      | 78                     | 72                     | 28                                     | 10                                                              |
|        | 22-25     | 57                         | 51                       | 61                     | 61                         | 68                      | 80                     | 77                     | 30                                     | 9                                                               |
|        | > 25      | 63                         | 63                       | 62                     | 62                         | 69                      | 76                     | 72                     | 38                                     | 9                                                               |

Proportion of affirmative answers; n=3021

32 participants reporting diverse gender were excluded from this analysis to protect participant anonymity.

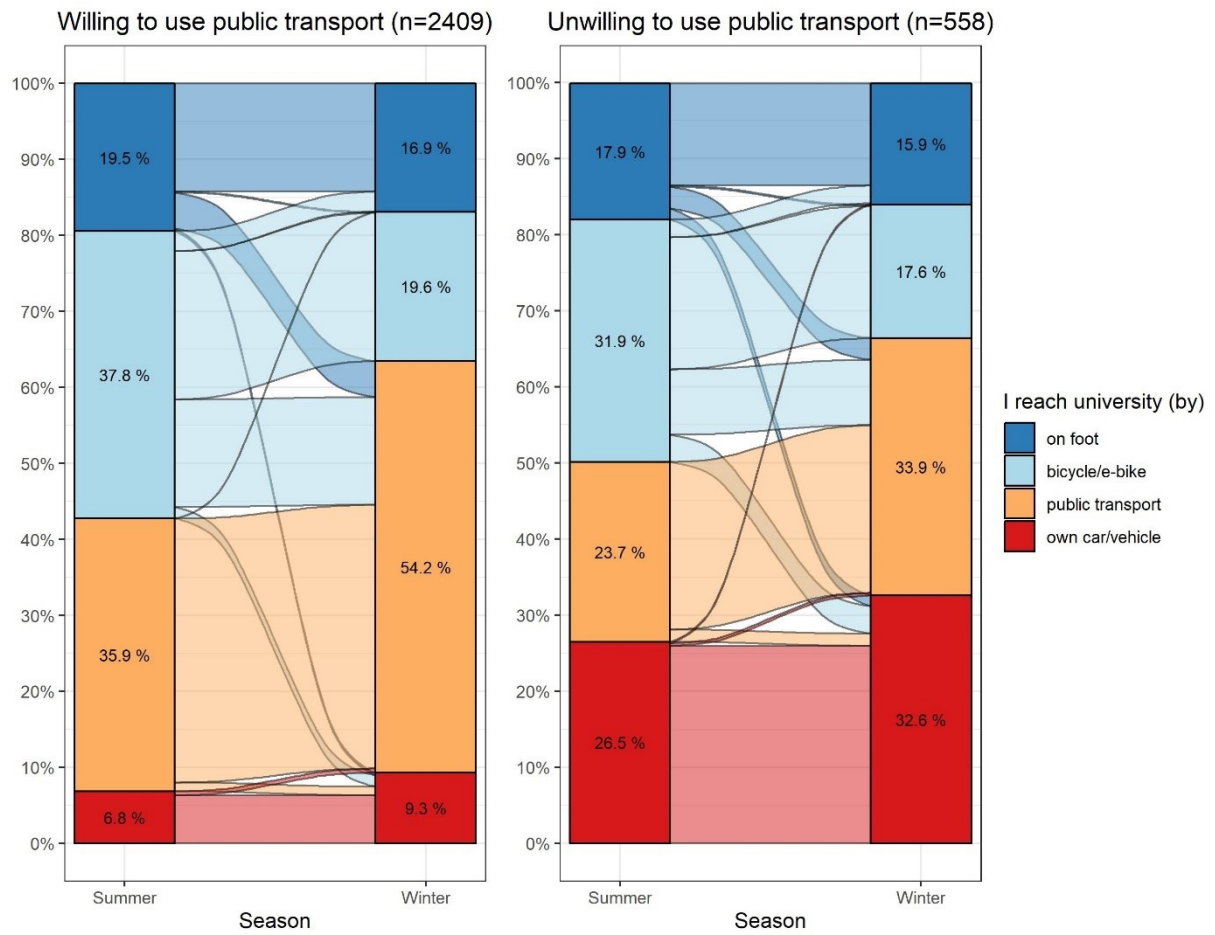

**Figure S2:** Means of transport commuting to and from university in the summer and the winter stratified by willingness to use public transport (n=2967).

The curves between the bar charts represent changes in the composition of the strata between summer and winter.

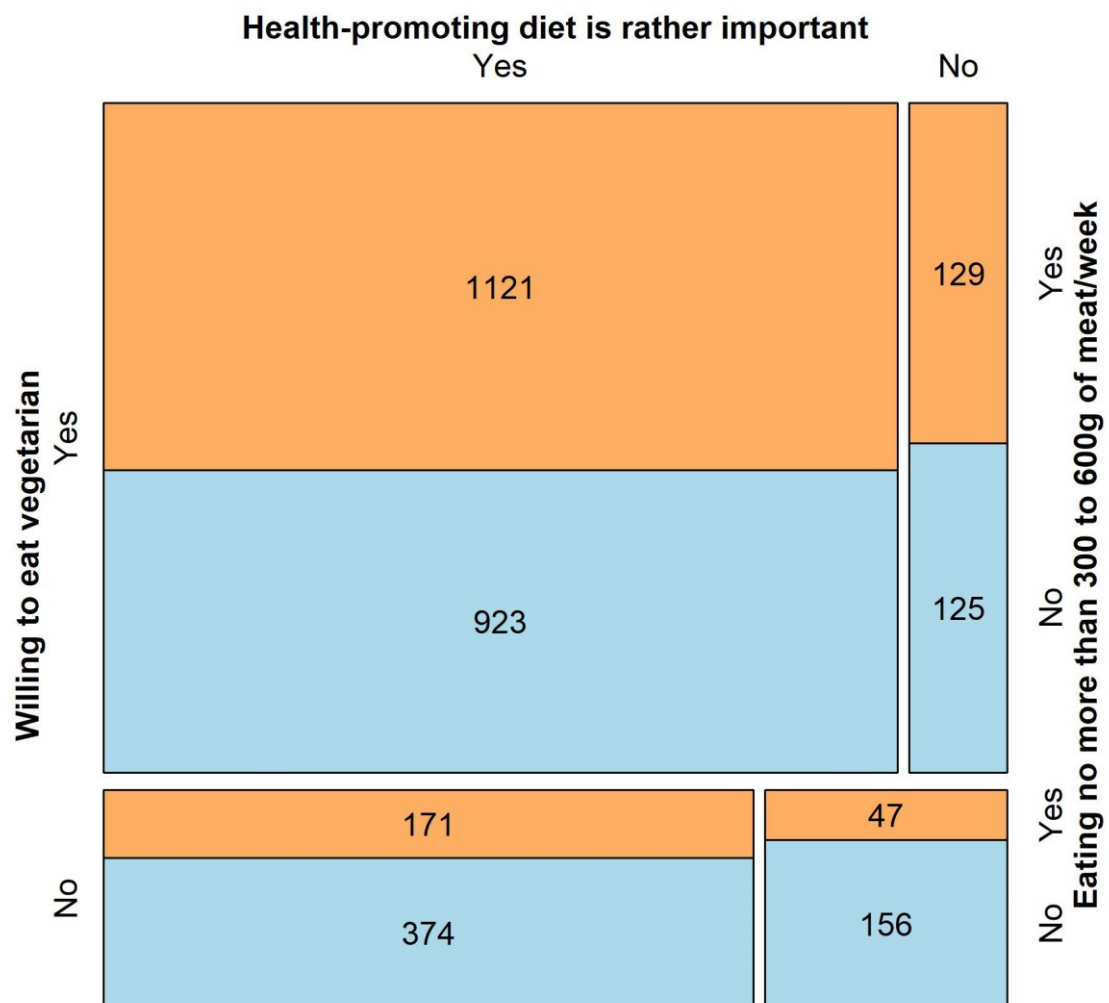

**Figure S3:** Relations between willingness to eat a vegetarian diet, meat consumption and personal value of a health-promoting diet (n=3046).
